# Supplementary material for: Enteropathogenic Escherichia coli-mediated fast and coordinated Ca²+ responses regulate NF-κB activation
Source: eLife. 2026 Jul 22;14:RP108953. doi: 10.7554/eLife.108953 (PMC13391085; doi:10.7554/eLife.108953)
Supplement: Figure 1—source data 1. [file elife-108953-fig1-data1.xlsx]

## Sheet: Fig. 1B
Relative amplitude of response
	WT	ΔespC
	1.39	2.6
	11.05	3
	17.78	3.1
	13.11	3.2
	9.99	3.3
	33.29	3.4
	8.06	3.5
	2.14	3.6
	2.24	3.7
	35.53	3.8
	4.52	3.9
	7.46	4
	13.83	4.1
	17.59	4.1
	5.85	4.2
	6.23	4.2
	6.44	4.2
	5.11	4.2
	10.49	4.2
	7.92	4.2
	10.3	4.2
	4.35	4.2
	2.95	4.2
	5.48	4.3
	5.14	4.3
	8.37	4.3
	4.67	4.3
	6.46	4.3
	12.04	4.4
	4.3	4.4
	3.43	4.4
	4.82	4.5
	5.64	4.5
	5.13	4.5
	13.32	4.6
	8.55	4.6
	4.63	4.6
	6.33	4.6
	6.97	4.7
	3.54	4.7
	4.11	4.7
	3.5	4.7
	4.72	4.7
	7.13	4.8
	6.59	4.8
	5.69	4.8
	15.66	4.8
	7.09	4.8
	4.51	4.9
	7.55	4.9
	15.1	4.9
	6.14	4.9
	3.41	4.9
	6.21	5
	10.39	5
	13.27	5
	6.22	5.1
	5.03	5.1
	5.46	5.2
	4.5	5.2
	4.16	5.2
	4.31	5.3
	8.24	5.3
		5.3
		5.3
		5.3
		5.4
		5.4
		5.4
		5.4
		5.4
		5.5
		5.5
		5.6
		5.6
		5.7
		5.8
		5.8
		5.9
		5.9
		5.9
		5.9
		6
		6
		6.1
		6.1
		6.3
		6.4
		6.4
		6.4
		6.5
		6.5
		6.5
		6.7
		6.7
		6.8
		6.8
		6.8
		6.9
		6.9
		6.9
		6.9
		7
		7
		7.1
		7.2
		7.3
		7.3
		7.3
		7.3
		7.3
		7.4
		7.4
		7.5
		7.5
		7.5
		7.5
		7.5
		7.5
		7.5
		7.5
		7.6
		7.6
		7.6
		7.7
		7.7
		7.7
		7.9
		8
		8.1
		8.1
		8.2
		8.2
		8.3
		8.4
		8.5
		8.5
		8.7
		8.8
		8.9
		9
		9
		9
		9.1
		9.1
		9.2
		9.2
		9.2
		9.2
		9.4
		9.5
		9.5
		9.5
		9.6
		9.7
		9.8
		9.9
		10
		10
		10.2
		10.2
		10.2
		10.3
		10.3
		10.5
		10.5
		10.5
		10.8
		11
		11.3
		11.3
		11.4
		11.4
		11.5
		11.6
		11.6
		11.7
		11.8
		11.9
		12.1
		12.1
		12.2
		12.3
		12.4
		12.5
		12.6
		12.7
		12.7
		12.9
		13
		13.2
		13.2
		13.5
		13.6
		13.8
		13.9
		13.9
		14
		14
		14.1
		14.1
		14.3
		14.7
		14.9
		15.3
		15.4
		15.8
		15.9
		15.9
		15.9
		15.9
		17.4
		18
		18.3
		18.7
		18.8
		18.9
		19.3
		19.3
		19.8
		20
		20.3
		23.7
		24.2
		24.3
		25.3
		25.5
		25.5
		26.3
		26.9
		27.4
		29.3
		30.8
		31.2
		31.8
		34.3
		34.6
		35.9
		36.5
		36.6
		38
		38.8
		39.7
		43.1
		48.9

## Sheet: Fig. 1C
% responding cells
	Low MOI			High MOI
	WT	ΔescN		WT	ΔescN
	31.3	0		69.2	0
	47.4	3.1		85	3.1
	40.9	0		72.7	0

## Sheet: Fig. 1E
Percentage of bacteria-associated actin-rich pedestals
	WT	ΔespC	ΔescN
	86.9	94.9	0
	83.8	96.3	0
	77	95	0

## Sheet: Fig. 1F
number of responses per cell during the first 30 min (0-30) and last 30 min (30-60) of bacterial challenge
		Low MOI				High MOI
		0-30	30-60			0-30	30-60
		0	1			0	1
		0	1			0	12
		1	0			0	1
		2	0			0	1
		0	5			0	1
		0	1			0	1
		0	1			0	1
		2	2			0	1
		1	1			0	6
		0	2			0	1
		0	8			0	2
		0	1			0	1
		0	2			1	3
		0	1			0	3
		1	0			0	7
		0	1			0	3
		0	1			0	2
		0	6			0	1
		0	5			4	10
		0	1			7	15
		0	3			0	5
		0	2			0	8
		0	2			0	2
		0	1			0	1
		0	1			0	4
		0	1			0	1
		0	4			0	1
						0	1
						0	3
						0	5
						0	2
						0	1
						2	4
						0	3
						0	1
						1	3
						1	2
						0	1
						0	1
						0	3
						0	1
						0	1
						0	1
						0	1
						1	1
						0	2
						0	4
						0	2
						0	1
