# Supplementary material for: Enteropathogenic Escherichia coli-mediated fast and coordinated Ca²+ responses regulate NF-κB activation
Source: eLife. 2026 Jul 22;14:RP108953. doi: 10.7554/eLife.108953 (PMC13391085; doi:10.7554/eLife.108953)
Supplement: Figure 2—figure supplement 1—source data 1. [file elife-108953-fig2-figsupp1-data1.xlsx]

## Sheet: Fig S2-B
Percent of cells exhibiting Ca2+ responses
	DespC	È U73122	È U73343	È PPADS
	100	0	100	55
	62	0	75	34
	92	1	75	26
	86	0	96	22
	53	0	89	0
	58		79	14
	50		100	17
	61		61	19
	92		67	0
	100			7
	87			37
	87			16
	68			4
	100			8
	100			6
	93
	96
	95

## Sheet: Fig S2-C
% Ca2+-responding cells
		WT		WT + HexoK (200U/ml)
		90		75
		87.5		43
		90		36
		75		38
		55		56
		93		70
				30

## Sheet: Fig S2-D
% ca2+ responding cells
		WT			ΔespC
	EGTA		È			È
		54.2	75.8		66.2	57.4
		41.7	58.5		70.6	73.5
		54.3	46.5		74.2	61.9

## Sheet: Fig S2-E
		WT							WT + EGTA
	5min	10min	15min	20min	25min			5min	10min	15min	20min	25min
	3	7	1	1	2			5	2	7	4	23
	1	3	1	1	1			1	16	1	12	2
	1	1	2	1	22			6	22	2	7	5
	5	2	1	1	17			13	25	16	20	3
	7	5	6	2	1			16	25	5	26	19
	4	1	5	1	10			14	44	6	2	1
	1	4	1	2	1			21	28	8	7	1
	1	1	1	3	6			1	14	17	3	2
	2	3	2	1	2			23	4	4	12	23
	1	2	1	1	3			39	29	6	10	32
	4	1	2	2	4			17	20	5	18	52
	2	1	4	1	1			27	11	24	2	9
	5	10	3	1	5			12	22	8	1	25
	2	15	2	1	5			29	17	9	28	24
	2	4	3	8	2			13	26	15	6	7
	2	42	13	13	5			28	4	2	22	5
	14	6	11	7	9			5	30	1	4	38
	28	2	7	10	41			12	1	25	18	36
	1	2	26	13	20			12	6	19	10	18
	2	23	25	2	2			37	2	4	26	8
	2	24	4	5	8			6	1	4	4	15
	1	4	10	35	45			13	22	4	13	22
	4	2	28	27	6			10	13	8	13	13
	11	15	39	2	12			8	12	5	9	16
	1	12	10	18	3			34	19	3	22	10
	2	8	5	4	15			25	14	14	10	12
	1	13	26	5	2			9	1	17	6	2
	5	14	19	20	6			5	28	3	3	25
	2	12	8	1	8			31	6	20	1	3
		4	15	13	3			28	13	4	3	4
		10	7	16	6			7	11	13	5	15
		2	5	1	4			8	36	3	27	4
		2	1	12	1			18	7	5	1	13
		2	9	6	9			23	4	16	7	15
		29	4	2	11			21	2	21	7
		1	2	8	18			27	19	7	5
		2	5	5	2			26	11	18	1
		4	5	15	2			33	13	5	8
		2	6	5	30			24	4	1	2
		19	2	4	4			43	9	4	2
		1	6	9	9			11	10	38	21
			4	3	9			11	22	28	12
			3	8	20			17	17	47	13
			2	9	11			23	16	25	35
			3	4	15			19	11	17	7
			3	4	22			35	17	7	1
			8	40	18			24	1	27	1
			6	3	1			13	5	10	2
			16	4	8			28	10	18	1
			2	3	12			30	10	2	10
				5	13			11	4	27	36
				5	14			11	9	4	16
				5	16			16	20	2	47
				7	4			31	1	7	45
				26	26			16	4	3	3
				2	16			1	6	3	24
				9	6			2	30	11	8
				11	6			1	2	35	8
				3	2			1	11	34	24
				6	5				1	45	3
				2	15				1		6
				9	2				18		7
				25	5				18		1
					7				1		15
					8						32
					1						14
					10						18
					8						22
											33
											8
											4
											6
											33
											16
											5
											11
											33

## Sheet: Fig S2-F
			EspC							EspC + EGTA
	5min	10min	15min	20min	25min			5min	10min	15min	20min	25min
	4	5	2	4	1			4	24	6	14	2
	2	3	3	2	2			9	6	4	20	4
	3	4	1	1	6			30	21	4	12	20
	16	9	1	3	11			5	1	6	12	10
	5	3	1	3	10			21	18	3	11	21
	2	1	2	2	7			15	5	31	6	4
	8	3	5	1	2			20	11	21	20	11
	21	9	4	7	14			11	6	16	4	8
	2	1	3	4	8			16	10	8	1	17
	5	2	9	2	3			22	5	1	3	5
	5	4	14	3	2			34	28	5	40	48
	2	2	4	6	3			39	13	3	4	6
	3	1	2	7	13			33	21	14	4	3
	2	2	9	4	2			35	27	7	2	21
	15	18	3	2	3			4	42	7	5	21
	2	35	4	8	3			23	26	17	11	22
	31	8	3	13	2			2	18	6	21	31
	26	6	4	18	9			20	17	3	12	16
	16	11	9	11	5			35	2	5	11	33
	10	31	9	6	17			16	3	15	16	33
	7	22	9	9	8			34	8	16	6	25
	7	14	5	25	8			26	37	2	15	4
	8	6	4	24	6			13	24	2	4	19
	12	22	22	12	15			32	21	4	11	26
	17	2	14	16	22			5	2	18	14	4
	18	5	15	2	21			30	12	13	10	10
	24	3	8	5	13			37	6	11	12	29
	24	15	22	6	16			20	13	7	19	32
	14	10	4	2	1			16	3	2	15	29
	21	20	22	10	8			13	7	13	7	35
	26	30	17	5	8			14	24	18	11	8
	7	31	15	8	10			15	17	16	14	2
	15	7	3	20	8			27	18	2	39	4
	1	29	8	17	4			23	19	4	2	3
	10	12	3	6	8			20	28	5	27	29
	15	15	5	2	17			21	18	4	20	13
	9	9	2	23	10			28	6	5	18	14
	3	26	11	2	19			7	7	9	7	2
	27	7	8	11	8			4	4	2	17	6
	15	6	1	15	6			10	13	1	12	6
	1	1	2	4	8			14	10	7	4	24
	18	6	20	25	12			20	12	2	5	22
	2	19	11	16	9			12	3	10	12	33
	1	24	7	4	9			5	8	7	8	2
	15	5	5	17	8			4	9	10	17	21
	6	5	11	1	3			7	3	2	5	31
	15	9	9	3	19			20	7	11	20	15
	6	11	7	4	12			2	12	5	13	40
	7	9	7	10	18			8	14	1	25	17
	9	4	5	9				16	8	4	32	3
	11	10	5	5				30	17	4	31	2
	8	12	11	3				10	5	2	2	16
	9	8	3	6				8	4	14	31	15
	12	6	5	3				3	6	3	12	22
	5	3	7	6				13	5	3	27	24
	6	4	7	13				4	5	8	14	25
	12	3	2	9				3	25	3	11	33
	7	4	5	7				11	4		22	2
	18	6	7	8				6	15		26	25
	11	2	6	8				1	15		9	14
	8	6	2	23				5	13		7	18
	8	7	6	3				6	2		12	3
	3	6	5	3				1	3		35	3
	4	9	5	7				5	9		34	9
	4	4		15				4	5		4	9
	2	7		29				2	4		1	10
	5	5		22				5	1		45	16
	3	6		12				5	1		35	12
	4	4		10				4	3		2	6
								2	2		15	7
								5	4		3
								4	5
								2	6
								6	3
								4	3
								13	4
								12	5
								6	6
								9
