# Supplementary material for: Enteropathogenic Escherichia coli-mediated fast and coordinated Ca²+ responses regulate NF-κB activation
Source: eLife. 2026 Jul 22;14:RP108953. doi: 10.7554/eLife.108953 (PMC13391085; doi:10.7554/eLife.108953)
Supplement: Figure 2—figure supplement 2—source data 1. [file elife-108953-fig2-figsupp2-data1.xlsx]

## Sheet: Feuil1
	WT		DespC
Suramin	-	+	-	+
	97.6	100	94.9	94.1
	100	97.1	96.3	94.4
	98.7	98.9	95	95.6
