# Supplementary material for: Enteropathogenic Escherichia coli-mediated fast and coordinated Ca²+ responses regulate NF-κB activation
Source: eLife. 2026 Jul 22;14:RP108953. doi: 10.7554/eLife.108953 (PMC13391085; doi:10.7554/eLife.108953)
Supplement: Figure 2—source data 1. [file elife-108953-fig2-data1.xlsx]

## Sheet: Fig. 2B
% Ca2+ responding cells
				Low MOI				High MOI
			WT		DespC			WT
		Suramin				È			È
			31.3		100	34.4		69.2	14.3
			47.4		92.6	38.5		85	13.5
			40.9		90	29.4		72.7	17.2

## Sheet: Fig. 2C
Number of responses per cell
				Low MOI				High MOI
			WT		DespC			WT
		Suramin				È			È
			2
			1		8	0		2	1
			1		13	1		1	1
			1		20	0		12	1
			2		24	2		1	1
			5		6	0		1	1
			1		5	0		1	1
			1		23	0		1	1
			4		8	1		1	1
			2		20	0		1	1
			2		23	1		6	1
			8		17	1		1	1
			1		6	1		2	1
			2		13	0		1	1
			1		15	0		4	1
			1		6	2		3	0
			1		6	7		7	0
			1		3	0		3	0
			6		8	0		2	0
			5		13	0		1	0
			1		17	1		14	0
			3		11	0		22	0
			2		11	0		5	0
			2		18	0		8	0
			1		18	0		2	0
			1		14	3		1	0
			1		4	1		4	0
			4		4	0		1	0
					4	0		1	0
					2	1		1	0
					3	0		3	0
					7	0		5	0
					4	0		2	0
					3	0		1	0
					1	2		6	0
						1		3	0
						5		1	0
						0		4	0
						0		3	0
						0		1	0
						1		1	0
						1		3	0
						0		1	0
						0		1	0
						0		1	0
						1		1	0
						0		2	0
						0		2	0
						0		4	0
						2		2	0
						1		1	0
						0
						0
						0
						1
						2
						1
						0
						4
						2
						0
						0
						0
						0
						3
						1
						0
