# Supplementary material for: Enteropathogenic Escherichia coli-mediated fast and coordinated Ca²+ responses regulate NF-κB activation
Source: eLife. 2026 Jul 22;14:RP108953. doi: 10.7554/eLife.108953 (PMC13391085; doi:10.7554/eLife.108953)
Supplement: Figure 3—source data 1. [file elife-108953-fig3-data1.xlsx]

## Sheet: Fig 3C
% responding cells
		WT				ΔespC
	control	È Suramin	È U73122		control	È Suramin	È U73122
	54.2	6.5	0		58.2	9.2	0
	41.7	0.5	0		70.6	1.5	0
	54.3	0	0		74.2	1	0

## Sheet: Fig 3E
Response amplitude
	WT	ΔespC	ΔescN
	3.5	20	0
	4.5	11	0
	10.2	15	0
	5	7	0
	7.3	7	0
	2.7	9	0
	8.2	13	0
	2.5	11	0
	6.3	9	0
	5.6	13	0
	2.7	7	0
	3.6	12	0
	3.6	12	0
	3.6	20	0
	3.6	8	0
	4.5	12	0
	4.5	10	0
	3.6	8	0
	3.6	10	0
	3.6	16	0
	4.5	9	0
	3.6	11	0
	6.3	9	1
	6.3	6	0
	12.6	3	0
	7.6	3	0
	3.8	4	0
	7.6	3	0
	5	5	0
	5	4	0
	3.8	7	0
	8.9	15	0
	6.3	6	0
	6.3	19	0
	6.3	6	0
	8.8	6	0
	5	19	0
	6.3	17	0
	7.6	17	0
	10.1	15	0
	7.6	12	0
	6.3	20	0
	6.3	19	0
	8.75	7	0
	3.75	19	0
	7.5	32	0
	7.5	10	0
	5	35	0
	17.5	7	0
	21.3	4	0
	7.5	13	0
	6.3	20	0
	10.3	9	0
	19.6	12	0
	4.7	9	0
	2.8	9	0
	5.5	10	0
	6.6	15	0
	4.5	9	0
	3.6	13	0
	6.4	6	0
	8	6	0
	5.5	12	0
	22.1	21	0
	5.3	24	0
	79*	12	0
	12.4	16	0
	35.7	5	0
	59	6	0
	11.4	4.8	0
	6.2	7.2	0
	2.7	8.4	0
	3.5	4.8	0
	6.2	2.4	1
	5	4.8	0
	3.8	3.6	0
	3.8	12	0
	6.3	10.8	0
	6.3	6	0
	2.5	3.6	0
	2.9	4.8	0
	3.6	3.6	0
	2.2	6	0
	3.1	3.6	0
	3.9	6	0
	6.2	15.7	0
	3.9	9.6	0
	4.7	4.8	0
	3.1	4.8	0
	3.6	7.8	0
	2.9	6.9	0
	2.9	6.9	0
	2.3	3.9	0
	3.1	7.8	0
	3.8	5.9	0
	3	2.9	0
	2.3	4.1	0
	2.3	2.7	0
	3.8	4.1	0
	3.8	5.4	0
	3.1	6.8	0
	5.3	5.4	0
	40.5	5.4	0
	20.7	4	0
	3.1	5.4	0
	2.1	8.1	0
	3.1	8.1	0
	2.6	6.8	0
	2.1	5.4	0
	2.1	5.4	0
	4.1	4	0
	3.3	8.1	0
	2.5	5.4	0
	4.1	13	0
	3.3	5.4	0
	6.6	3.3	0
	5.7	13	0
	3.3	11.9	0
	3.3	4.3	0
	4.9	3.3	0
	3.3	11.9	0
	3.3	5.6	0
	3.3	5.6	0
	3.3	5.6	0
	3.3	6.7	0
	4.9	6.7	0
	2.5	4.5	0
	3.8	4.5	0
	3.8	4.5	0
	1.6	8.2	0
	4.9	4.7	0
	2.2	5.9	0
	4.3	3.5	0
	2.2	5.9	0
	2.2	3.5	0
	33.5	5.9	0
	2.8	5.9	0
	2.8	7.1	0
	3.5	5.9	0
	2.8	4.7	0
	3.5	4.7	0
	2.8	5.9	0
	5.6	5.9	0
	2.8	5.9	0
	2.8	4.7	0
	5.6	3.5	0
	6.3	7.1	0
	3.5	3.5	0
	5.6	3.5	0
	5.6	4.7	0
	3.5	5.9	0
	3.5	3.5	0
	2.1	4.7	0
	4.2	3.5	0
	7	3.5	0
	7	5.9	0
	5.6	15.3	0
	3.5	2.4	0
	5.6	4.7	0
	8.5	2.4	0
	13.4	5.9	0
	3.5	11.5	0
	7	9.2	0
	2.8	3.3	0
	5.6	3.3	0
	2.7	14.1	0
	3.4	4.9
	2.7	3.5
	8.8	5.6
	2.7	4.2
	4.1	4.2
	2.7	9.2
	3.4	5.6
	2.7	7.7
	2.7	16.2
	3.4	19.7
	2.7	16.2
	2.7	14.8
	3.4	5.6
	10.7	7
	3	5.6
	3	6.3
	3.6	2.1
	4.1	4.2
	2.4	1.4
	3	3.5
	3	4.9
	3.6	7.7
	21.3	5.6
	4.3	64.4
	12	13.4
	2.9	7.4
	4.3	7.9
	3.6	2
	6.4	2.5
	5.75	2.5
	4.1	17.8
	3.3	8.9
	2.5	2
	3.3	1.9
	3.3	12.4
	4.9	3.5
	3.3	18.8
	5.7	2.5
	4.1	4
	4.1	3.9
	7.4	3
	8.2	6.4
	4.9	4.5
	3.3	3.5
	3.3	2
	3.3	2.5
	4.4	2
	2.2	1
	3.3	1
	4.4	2.3
	4.4	5.3
	3.3	3
	2.2	5.3
	2.2	4.5
	2.2	2.3
	2.2	3
	1.7	4.5
	1.7	5.3
	2.2	6
	2.2	3
	2.6	5.3
	2.6	3
	1.7	3
	1.7	5.3
	2.2	2.3
	2.6	3.8
	9.2	3
	2.1	3
	1.2	3.8
	1.7	3.8
	4.1	7.5
	2.5	2.3
	1.7	6.8
	2.9	4.5
	2.9	6
	2.5	4.5
	2.9	4.5
	9.1	10.5
	3.8
	3.1
	5
	4.4
	2.5
	2.5
	1.5*
	2.3*
	3.8*
	1.1*
	2.3*
	1.5*
	1.5*
	1.9*
	1.9*
	1.5*
	1.5*
	1.5*
	1.5*
	4.5*
	10.6*
	2.3*
	2.3*
	2.3*
	2.3*
	3.2*
	9*
	1.8*
	1.8*
	2.3*
	2.3*
	5*
	2.7*
	2.1*
	1.6*
	2.1*
	1.6*
	2.6*
	1.6*
	3.7*
	2.6*
	2.1*
	1*
	2.1*
	3.5*
	2*
	1.2*
	2.3*
	1.6*
	2.3*
	1.6*
	1.2*
	1.2*
	2.3*
	1.6*
	3.5*
	1*
	2*
	1.2*
	3.1*
	6.2*
	4.7*
	3.1*
	3.1*
	3.9*
	4.7*
	3.1*
	9.3*
	3.1*
	3.1*
	6.2*
	2.3*
	7.8*
	3.1*
	2.9*
	1.7*
	2.9*
	1.7*
	2.9*
	1.7*
	2.9*
	2.3*
	2.9*
	2.3*
	2.9*
	2.3*
	1.1*
	2.9*
	1.7*
	3.4*
	3.4*
	2.9*
	2.3*
	2.3*
	2.9*
	2.9*
	3.8*
	3.8*
	3.8*
	6.7*
	4.8*
	5.7*
	3.5*
	5.3*
	3.5*
	3.5*
	2.7*
	2.7*
	2.7*
	3.5*
	3.5*
	2.7*
	3.5*
	4.6*
	25.9*
	3.6*
	4.6*
	2*
	3*
	2.5*
	5.1*
	4.6*
	2.5*
	2.5*
	22.3*
	4.6*
	5.6*
	2.6*
	3.3*
	2.6*
	2*
	3.3*
	5.2*
	1.3*
	3.3*
	3.3*
	3.3*
	2.6*
	2.6*
	3.9*
	2*
	3*
	1.8*
	2.4*
	4.7*
	3.6*
	1.8*
	3*
	34*
	62.1*
	12.5*
	10*
	5.8*
	3.5*
	5.8*
	4.7*
	5.8*
	4.7*
	4.7*
	5.8*
	3.5*
	18.1*
	9.6*
	10.8*
	6*
	10.8*
	4.8*
	4.8*
	4.8*
	5.4*
	4.2*
	4.2*
	7.7*
	6.7*
	8.3*
	8.3*
	6.7*
	5*
	6.7*
	5*
	6.7*

## Sheet: Fig 3F
Frequency of response
			WT						I ΔespC								ΔescN
	5min	10min	15min	20min	25min			5min	10min	15min	20min	25min			5min	10min	15min	20min	25min
	3	7	1	1	2			4	5	2	4	1			0	0	0	0	0
	1	3	1	1	1			2	3	3	2	2			0	0	0	0	0
	1	1	2	1	22			3	4	1	1	6			0	1	0	0	0
	5	2	1	1	17			16	9	1	3	11			0	0	0	0	0
	7	5	6	2	1			5	3	1	3	10			0	0	0	0	0
	4	1	5	1	10			2	1	2	2	7			0	0	0	0	0
	1	4	1	2	1			8	3	5	1	2			0	0	0	0	0
	1	1	1	3	6			21	9	4	7	14			0	0	0	0	0
	2	3	2	1	2			2	1	3	4	8			0	0	0	0	0
	1	2	1	1	3			5	2	9	2	3			0	0	0	0	0
	4	1	2	2	4			5	4	14	3	2			0	0	0	0	0
	2	1	4	1	1			2	2	4	6	3			0	0	0	0	0
	5	10	3	1	5			3	1	2	7	13			0	0	0	0	0
	2	15	2	1	5			2	2	9	4	2			0	0	0	0	1
	2	4	3	8	2			15	18	3	2	3			0	0	0	0	0
	2	42	13	13	5			2	35	4	8	3			0	0	0	0	0
	14	6	11	7	9			31	8	3	13	2			0	0	0	0	0
	28	2	7	10	41			26	6	4	18	9			0	0	0	0	0
	1	2	26	13	20			16	11	9	11	5			0	0	0	0	0
	2	23	25	2	2			10	31	9	6	17			0	0	0	0	0
	2	24	4	5	8			7	22	9	9	8			0	0	0	0	0
	1	4	10	35	45			7	14	5	25	8			0	0	0	0	0
	4	2	28	27	6			8	6	4	24	6			0	0	0	0	0
	11	15	39	2	12			12	22	22	12	15			0	0	0	0	0
	1	12	10	18	3			17	2	14	16	22			0	0	0	0	0
	2	8	5	4	15			18	5	15	2	21			0	0	0	0	0
	1	13	26	5	2			24	3	8	5	13			0	0	0	0	0
	5	14	19	20	6			24	15	22	6	16			0	0	0	0	0
	2	12	8	1	8			14	10	4	2	1			0	0	0	0	0
		4	15	13	3			21	20	22	10	8			0	0	0	0	0
		10	7	16	6			26	30	17	5	8			0	0	0	0	0
		2	5	1	4			7	31	15	8	10			0	0	0	0	0
		2	1	12	1			15	7	3	20	8			0	0	0	0	0
		2	9	6	9			1	29	8	17	4			0	0	0	0	0
		29	4	2	11			10	12	3	6	8			0	0	0	0	0
		1	2	8	18			15	15	5	2	17			0	0	0	0	0
		2	5	5	2			9	9	2	23	10			0	0	0	0	0
		4	5	15	2			3	26	11	2	19			0	0	0	0	0
		2	6	5	30			27	7	8	11	8			0	0	0	0	0
		19	2	4	4			15	6	1	15	6			0	0	0	0	0
		1	6	9	9			1	1	2	4	8
			4	3	9			18	6	20	25	12
			3	8	20			2	19	11	16	9
			2	9	11			1	24	7	4	9
			3	4	15			15	5	5	17	8
			3	4	22			6	5	11	1	3
			8	40	18			15	9	9	3	19
			6	3	1			6	11	7	4	12
			16	4	8			7	9	7	10	18
			2	3	12			9	4	5	9
				5	13			11	10	5	5
				5	14			8	12	11	3
				5	16			9	8	3	6
				7	4			12	6	5	3
				26	26			5	3	7	6
				2	16			6	4	7	13
				9	6			12	3	2	9
				11	6			7	4	5	7
				3	2			18	6	7	8
				6	5			11	2	6	8
				2	15			8	6	2	23
				9	2			8	7	6	3
				25	5			3	6	5	3
					7			4	9	5	7
					8			4	4		15
					1			2	7		29
					10			5	5		22
					8			3	6		12
								4	4		10
