# Supplementary material for: Enteropathogenic Escherichia coli-mediated fast and coordinated Ca²+ responses regulate NF-κB activation
Source: eLife. 2026 Jul 22;14:RP108953. doi: 10.7554/eLife.108953 (PMC13391085; doi:10.7554/eLife.108953)
Supplement: Figure 4—figure supplement 2—source data 1. [file elife-108953-fig4-figsupp2-data1.xlsx]

## Sheet: Fig4-figure supplement 2C
	Ca2+ responding cells (%)
	DescN		DespC
			control		+PPADS		È73343		È73122
	0		35		2		60		0
	9		100		10		40		6
	2		34		10		72		2
	9		53		26		48		5
	7		76		22		52		2
	4		30		11		46
	8		69		14		50
	2		46		15		57
			44		10
			53		30
			50		0
			95

## Sheet: Fig4-figure supplement 2E
	DescN		DespC
			control		+PPADS		U73343		U73122
	0		34		10		18		0
	9		20		4		18		0
	2		30		0		21		1
	9		69		6		52		0
	7		53		3		46		0
	4		50		0		72		1
	8		37		0		38		0
	2		43		0		48

## Sheet: Fig4-figure supplement 2G
	Ca2+ responding cells (%)
	Hela								TC7
	ATP, µM	0	0.3	1	3	10	30		ATP, µM	0	0.3	1	3	10	30
		0	4.5	11	34	57	77			0	1.5	3	17	27	60
		0	0	0	28	86	93			0	0	4	83	76	97
		0	8	18	75	96	100			0	0	2	97	44	97
		0	20	34	62	100	100			0	0	50	30	65	100
		0	18	72	86	93	100			0	2.5	47	65	50	100
		0	7	74	97	100	100			0	3	3	18	65
		0	6	71	100	100	93			0	2	12	63	50
		0	16	72			100			0	1	17	45	97
		0	13	86			100			0	1	41	60	98
		0	14	67			100			0		7	54
			9	32			100					3	32
			18	69			100					10	28
			12	78			100					22	50
				76			94					29	23
				61			98					7
				72			97					17
				62			96					16
				55			100					6
				77			100					19
							100
