# Supplementary material for: Enteropathogenic Escherichia coli-mediated fast and coordinated Ca²+ responses regulate NF-κB activation
Source: eLife. 2026 Jul 22;14:RP108953. doi: 10.7554/eLife.108953 (PMC13391085; doi:10.7554/eLife.108953)
Supplement: Figure 4—figure supplement 4—source data 1. [file elife-108953-fig4-figsupp4-data1.xlsx]

## Sheet: Fig4-figure supplement4B
	Ca2+ responding cells (%)
	ATP + EGTA		ATP
	13.95		66.67
	21.62		73.68
	9.52		54.55
	13.33		50
	11.36

## Sheet: Fig4-figure supplement4C
		Number of responses/cell
		ATP + EGTA					average		ATP				average
		1	1	2	1	1	1.2		6	10	6	3	6.25
		1	1	1	2	2	1.4		2	4	2	3	2.75
		1	2	1	2	1	1.4		4	10	1	4	4.75
		3	1	1	1	2	1.6		3	9	9	1	5.5
		1	1		1	2	1.25		6	5	1	3	3.75
		1	1		2		1.33333		2	6	3	1	3
		3	3				3		8	6		2	5.33333
									8	1			4.5
									1	2			1.5
									5	6			5.5
									8	3			5.5
									8	2			5
									1	1			1
									1	1			1
