# Supplementary material for: Enteropathogenic Escherichia coli-mediated fast and coordinated Ca²+ responses regulate NF-κB activation
Source: eLife. 2026 Jul 22;14:RP108953. doi: 10.7554/eLife.108953 (PMC13391085; doi:10.7554/eLife.108953)
Supplement: Figure 6—source data 3. [file elife-108953-fig6-data3.xlsx]

## Sheet: Fig 6-B
Densitometry analysis of the indicated antibody signal normalized to that of HSP90
	Time (min)		TNFα					TNFα + ATP
	0	0.142207	0.205193	0.609103	0.236574		0.174359	0.187845	0.425393	0.185406
	5		0.652515	1.01694	0.731773			0.370016	0.5808	0.58731
	10		1.18322	1.90625	1.10547		1.16373	0.751218	0.954028	0.840433
	12	1.18594		1.97151	1.73158		1.0806		1.07486	0.947595
	15		1.11358	1.47239	1.47921		1.21813	0.988912	1.36954	0.999595
	30	0.982277	1.11559	1.07959	1.01102		0.389186	0.91026	0.791783	0.898154
	60	0.148769		0.855339	0.694188		0.0964895		0.810371	0.819921

## Sheet: Fig 6-C
Densitometry analysis of the indicated antibody signal normalized to that of HSP90
	Time (min)		TNFα					TNFα + ATP
	0	0.92166		1.06728	1.02554		0.989601	1.17574	1.14848	1.09746
	5	0.841104	0.891606	0.778355	1.02754		1.05972	1.02897	1.07816	1.02523
	10	0.678658	0.65104	0.670048	0.727248		1.02382	0.930556	0.87419	0.924939
	12	0.554527	0.523417	0.365563	0.503983		0.9188	0.767239	0.702159	0.611979
	15	0.307492	0.41083	0.311248	0.621153		0.83569	0.570709	0.570979	0.873077
	30	0.087163	0.115067	0.065135	0.092973		0.320074	0.088732	0.129543	0.149315
	60		0.094599	0.052108	0.050485			0.048175	0.06274	0.062961

## Sheet: Fig 6-E
Densitometry analysis of the indicated antibody signal normalized to that of total P65
	Time (min)		TNFα					TNFα + ATP
	0	0.221565	0.18794	0.108455	0.131463		0.055791	0.113302	0.071145	0.105933
	5	0.994455	0.557325	0.264692	0.34531		0.380068	0.280445	0.256533	0.184572
	10	0.72525	0.817511	0.758867	1.17495		0.167959	0.377664	0.519095	0.601804
	12		0.617364	0.457862	0.896468			0.439962	0.657185	0.747084
	15	0.291196	0.574792	0.420426	0.699285		0.043086	0.317467	0.517075	0.794321
	30	0.00965	0.180447	0.069841	0.121459		0.012885	0.205791	0.082014	0.162818
	60	0.005581		0.062144	0.108576		0.01767		0.070039	0.140698

## Sheet: Fig 6-H
Densitometry analysis of the indicated antibody signal normalized to that of total P65
	Time (min)	TNFa				TNFa + BAPTA				TNFa + ATP				TNFa + ATP +BAPTA
	0	0.222684	0.156139	0.0922144		0.150275	0.0995285	0.0708142		0.149503	0.100772	0.0619763		0.0970131	0.0672475	0.0523462
	5	0.268135	0.210877	0.124014		0.158084	0.102515	0.0775137		0.126567	0.0995321	0.0569949		0.0951517	0.0719353	0.0525593
	10	1.41898	1.37277	0.915411		1.39903	1.24296	0.99948		1.5132	0.97847	0.825728		1.77678	1.28897	1.37968
	12	2.40085	2.31529	1.82185		2.07894	2.10524	1.41883		1.78121	1.36483	1.22039		2.54672	2.39558	1.7823
	15	0.323568	0.281989	0.186845		0.291337	0.170574	0.144453		0.221399	0.146444	0.111011		0.429517	0.281641	0.220297
	30	0.34975	0.282928	0.207063		0.391144	0.228123	0.157311		0.246145	0.158064	0.138504		0.241512	0.162778	0.1237
	60	0.215139	0.15694	0.101559		0.2001	0.113397	0.0815059		0.150908	0.110923	0.0786463		0.180032	0.133203	0.0802881
